# Supplementary material for: Efficient and selective removal of Congo red by a C@Mo composite nanomaterial using a citrate-based coordination polymer as the precursor
Source: Royal Society of Chemistry journal article supplement (doi:10.1039/d1dt01655e), 2021-01-01
Supplement: d1dt01655e1.pdf [file d1dt01655e1.pdf]

## Supporting Information

# Efficient and selective removal of Congo red by a C@Mo composite nanomaterial using a citrate-based coordination polymer as the precursor

Xiao-Sa Zhang,<sup>a</sup> Hong-Tian Zhao,<sup>a</sup> Yu Liu,<sup>a</sup> Wen-Ze Li,<sup>a\*</sup> Yan Wang,<sup>a</sup> Xiao-Yu Zhao,<sup>a</sup>  
Ai-Ai Yang<sup>a</sup> and Jian Luan<sup>b\*</sup>

<sup>a</sup> College of Sciences, Shenyang University of Chemical Technology, Shenyang, 110142, P. R. China

<sup>b</sup> College of Sciences, Northeastern University, Shenyang, 100819, P. R. China

E-mail: [liwenze@syuct.edu.cn](mailto:liwenze@syuct.edu.cn) (W. Z. Li); [2010044@stu.neu.edu.cn](mailto:2010044@stu.neu.edu.cn) (J. Luan)

**Table S1** Selected bond distances (Å) and angles (°) for complex **1**

|                   |            |                    |            |
|-------------------|------------|--------------------|------------|
| Cu(1)–O(1)        | 1.934(5)   | Cu(2)–O(1W)        | 2.089(5)   |
| Cu(1)–O(5)        | 1.936(4)   | Cu(2)–O(7)         | 1.912(4)   |
| Cu(1)–O(4)        | 1.944(4)   | Cu(2)–O(2)         | 1.921(5)   |
| Cu(1)–O(7)        | 1.951(4)   | Cu(2)–O(3)#2       | 1.923(5)   |
| Cu(1)–O(6)#1      | 2.285(4)   | Cu(2)–O(2W)        | 2.275(5)   |
| O(1)–Cu(1)–O(5)   | 158.7(2)   | O(7)–Cu(2)–O(2)    | 93.3(2)    |
| O(1)–Cu(1)–O(4)   | 88.63(19)  | O(7)–Cu(2)–O(3)#2  | 97.09(18)  |
| O(5)–Cu(1)–O(4)   | 90.53(18)  | O(2)–Cu(2)–O(3)#2  | 169.6(2)   |
| O(1)–Cu(1)–O(7)   | 97.55(18)  | O(7)–Cu(2)–O(1W)   | 135.79(19) |
| O(5)–Cu(1)–O(7)   | 84.59(17)  | O(2)–Cu(2)–O(1W)   | 82.9(2)    |
| O(4)–Cu(1)–O(7)   | 173.37(17) | O(3)#2–Cu(2)–O(1W) | 88.7(2)    |
| O(1)–Cu(1)–O(6)#1 | 94.6(2)    | O(7)–Cu(2)–O(2W)   | 136.04(18) |
| O(5)–Cu(1)–O(6)#1 | 106.6(2)   | O(2)–Cu(2)–O(2W)   | 86.7(2)    |
| O(4)–Cu(1)–O(6)#1 | 87.89(17)  | O(3)#2–Cu(2)–O(2W) | 86.8(2)    |
| O(7)–Cu(1)–O(6)#1 | 89.20(17)  | O(1W)–Cu(2)–O(2W)  | 87.89(18)  |

Symmetry code: #1  $-x + 2, y - 1/2, -z + 1/2$ ; #2  $x, -y + 3/2, z - 1/2$

## Supporting Information

**Table S2. Coordination Modes of Carboxylic Ligand H<sub>4</sub>cit (Other Metal-based CPs)**

| No. | CP                                                                                                                                                                              | cit anion                                                                           | Coordination mode | Coordination mode of –COO group                                                                  | –OH     | Reference |
|-----|---------------------------------------------------------------------------------------------------------------------------------------------------------------------------------|-------------------------------------------------------------------------------------|-------------------|--------------------------------------------------------------------------------------------------|---------|-----------|
| A4  | [Gd(cit)(H <sub>2</sub> O)]                                                                                                                                                     | 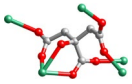   | Pentadentate      | $\mu_2-\eta^1:\eta^1$<br>$\mu_2-\eta^1:\eta^1$<br>$\mu_1-\eta^1:\eta^0$                          | $\mu_1$ | S1        |
| A5  | [5Ba(Hcit) <sub>2</sub> (H <sub>2</sub> cit) <sub>2</sub> ·6H <sub>2</sub> O]·2H <sub>2</sub> O                                                                                 |    | Biadentate        | $\mu_1-\eta^1:\eta^0$<br>$\mu_0-\eta^0:\eta^0$                                                   | NA      | S2        |
|     |                                                                                                                                                                                 |                                                                                     | Tetradentate      | $\mu_2-\eta^2:\eta^1$<br>$\mu_3-\eta^2:\eta^1$<br>$\mu_1-\eta^1:\eta^0$<br>$\mu_2-\eta^2:\eta^1$ | $\mu_1$ |           |
| A6  | [5.5Pb(Hcit) <sub>3</sub> (H <sub>2</sub> cit)·5H <sub>2</sub> O]·4.5H <sub>2</sub> O                                                                                           |   | Tetradentate      | $\mu_1-\eta^1:\eta^0$<br>$\mu_2-\eta^2:\eta^0$<br>$\mu_2-\eta^1:\eta^0$                          | $\mu_1$ | S2        |
|     |                                                                                                                                                                                 |                                                                                     | Pentadentate      | $\mu_2-\eta^1:\eta^1$<br>$\mu_3-\eta^3:\eta^1$                                                   | $\mu_1$ |           |
| A7  | [Na(OH <sub>2</sub> ) <sub>6</sub> ]·{[Na <sub>3</sub> (OH <sub>2</sub> ) <sub>8</sub> ] <sub>3</sub> [NaPd <sub>3</sub> (cit) <sub>3</sub> ] <sub>2</sub> }·(H <sub>2</sub> O) |  | Sexadentate       | $\mu_3-\eta^2:\eta^1$<br>$\mu_1-\eta^1:\eta^0$                                                   | $\mu_3$ | S3        |
| A8  | [FeCd <sub>2</sub> (Hcit) <sub>2</sub> (H <sub>2</sub> O) <sub>2</sub> ]                                                                                                        |  | Tetradentate      | $\mu_3-\eta^2:\eta^1$<br>$\mu_1-\eta^1:\eta^1$                                                   | $\mu_1$ | S4        |
| A9  | [Cd <sub>3</sub> (Hcit) <sub>2</sub> (H <sub>2</sub> O) <sub>2</sub> ]                                                                                                          |  | Tetradentate      | $\mu_3-\eta^2:\eta^1$<br>$\mu_3-\eta^2:\eta^1$<br>$\mu_1-\eta^1:\eta^1$                          | $\mu_1$ | S4        |
| A10 | [NiZn <sub>2</sub> (Hcit) <sub>2</sub> (H <sub>2</sub> O) <sub>2</sub> ]                                                                                                        |  | Tetradentate      | $\mu_3-\eta^2:\eta^1$<br>$\mu_3-\eta^2:\eta^1$<br>$\mu_1-\eta^1:\eta^1$                          | $\mu_1$ | S5        |
| A11 | [CoCd <sub>2</sub> (Hcit) <sub>2</sub> (H <sub>2</sub> O) <sub>2</sub> ]                                                                                                        |  | Tetradentate      | $\mu_3-\eta^2:\eta^1$<br>$\mu_3-\eta^2:\eta^1$<br>$\mu_1-\eta^1:\eta^1$                          | $\mu_1$ | S5        |
| A12 | [CoZn <sub>2</sub> (Hcit) <sub>2</sub> (H <sub>2</sub> O) <sub>2</sub> ]                                                                                                        |  | Tetradentate      | $\mu_3-\eta^2:\eta^1$<br>$\mu_3-\eta^2:\eta^1$<br>$\mu_1-\eta^1:\eta^1$                          | $\mu_1$ | S5        |
| A13 | [Ln(Hcit)(H <sub>2</sub> O) <sub>2</sub> ·2H <sub>2</sub> O]<br>(Ln = Sm, Gd, Er, Nd)                                                                                           |  | Tridentate        | $\mu_3-\eta^2:\eta^1$<br>$\mu_2-\eta^1:\eta^1$<br>$\mu_1-\eta^1:\eta^0$                          | $\mu_1$ | S6        |

## Supporting Information

|            |                                                                                                                                                                               |                                                                                     |              |                                                                         |         |     |
|------------|-------------------------------------------------------------------------------------------------------------------------------------------------------------------------------|-------------------------------------------------------------------------------------|--------------|-------------------------------------------------------------------------|---------|-----|
| <b>A14</b> | [NiCd(cit)(H <sub>2</sub> O)]                                                                                                                                                 | 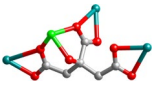   | Tetradentate | $\mu_3-\eta^2:\eta^1$<br>$\mu_3-\eta^2:\eta^1$<br>$\mu_1-\eta^1:\eta^1$ | $\mu_1$ | S7  |
| <b>A15</b> | [Ge(Hcit) <sub>2</sub> Ba(H <sub>2</sub> O) <sub>3</sub> ]<br>·3H <sub>2</sub> O                                                                                              |    | Tridentate   | $\mu_1-\eta^1:\eta^0$<br>$\mu_1-\eta^1:\eta^0$<br>$\mu_2-\eta^1:\eta^1$ | $\mu_1$ | S8  |
| <b>A16</b> | [Cu <sub>2</sub> Ge(cit) <sub>2</sub> (INH) <sub>2</sub> ]<br>·4H <sub>2</sub> O                                                                                              |    | Tridentate   | $\mu_1-\eta^1:\eta^0$<br>$\mu_2-\eta^1:\eta^1$<br>$\mu_1-\eta^1:\eta^0$ | $\mu_1$ | S9  |
| <b>A17</b> | [M(Hcit)(H <sub>2</sub> cit)(H <sub>3</sub> cit)(H <sub>2</sub> O)]<br>·H <sub>2</sub> O<br>(M = La, Ce)                                                                      |    | Biadentate   | $\mu_2-\eta^2:\eta^0$<br>$\mu_1-\eta^1:\eta^0$<br>$\mu_0-\eta^0:\eta^0$ | $\mu_1$ | S10 |
|            |                                                                                                                                                                               |    | Tetradentate | $\mu_3-\eta^2:\eta^1$<br>$\mu_3-\eta^2:\eta^1$<br>$\mu_0-\eta^0:\eta^0$ | $\mu_1$ |     |
| <b>A18</b> | [Zn(Hcit)(phen)(H <sub>2</sub> O)]<br>[[Zn <sub>2</sub> (Hcit)(phen) <sub>2</sub> (H <sub>2</sub> O) <sub>3</sub> ]<br>·13.5H <sub>2</sub> O<br>phen =<br>1,10-phenanthroline |    | Tetradentate | $\mu_3-\eta^2:\eta^1$<br>$\mu_3-\eta^2:\eta^1$<br>$\mu_0-\eta^0:\eta^0$ | $\mu_1$ | S11 |
|            |                                                                                                                                                                               |   | Biadentate   | $\mu_1-\eta^1:\eta^1$<br>$\mu_1-\eta^1:\eta^0$<br>$\mu_1-\eta^1:\eta^0$ | $\mu_1$ |     |
| <b>A19</b> | [Zn <sub>3</sub> (Hcit) <sub>2</sub> (phen) <sub>4</sub> ]<br>·14H <sub>2</sub> O                                                                                             |  | Biadentate   | $\mu_1-\eta^1:\eta^1$<br>$\mu_1-\eta^0:\eta^0$<br>$\mu_0-\eta^0:\eta^0$ | NA      | S11 |
| <b>A20</b> | [Co <sub>8</sub> (cit) <sub>4</sub> (bbi) <sub>6</sub> (H <sub>2</sub> O) <sub>10</sub> ]<br>·7H <sub>2</sub> O<br>bbi =<br>1,1'-(1,4-butanediyl)bis(imidazole)               |  | Pentadentate | $\mu_2-\eta^2:\eta^0$<br>$\mu_2-\eta^2:\eta^0$<br>$\mu_1-\eta^1:\eta^0$ | $\mu_3$ | S12 |

## Supporting Information

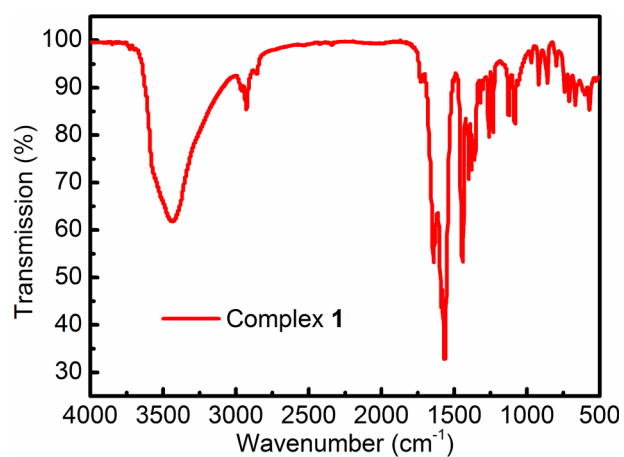

**Fig. S1** The IR spectrum of complex 1.

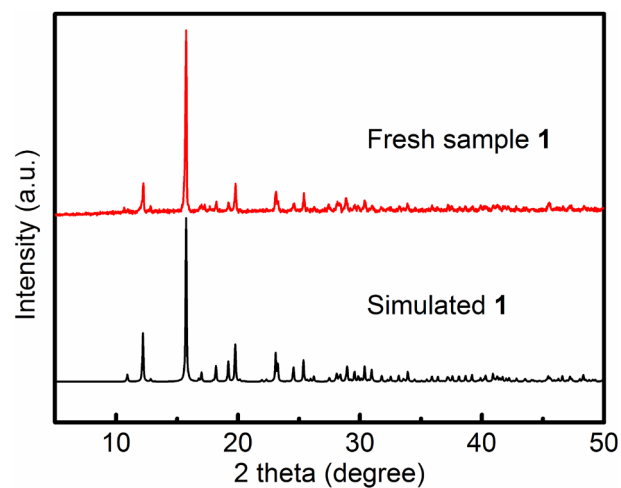

**Fig. S2** The PXRD patterns of simulated and fresh sample for complex 1.

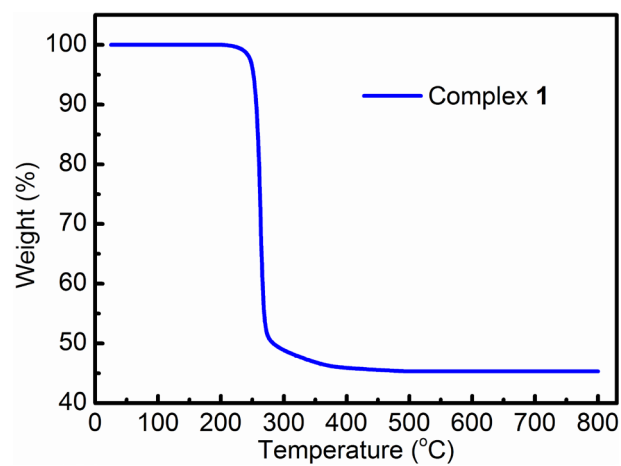

**Fig. S3** The TG curve of complex 1.

## Supporting Information

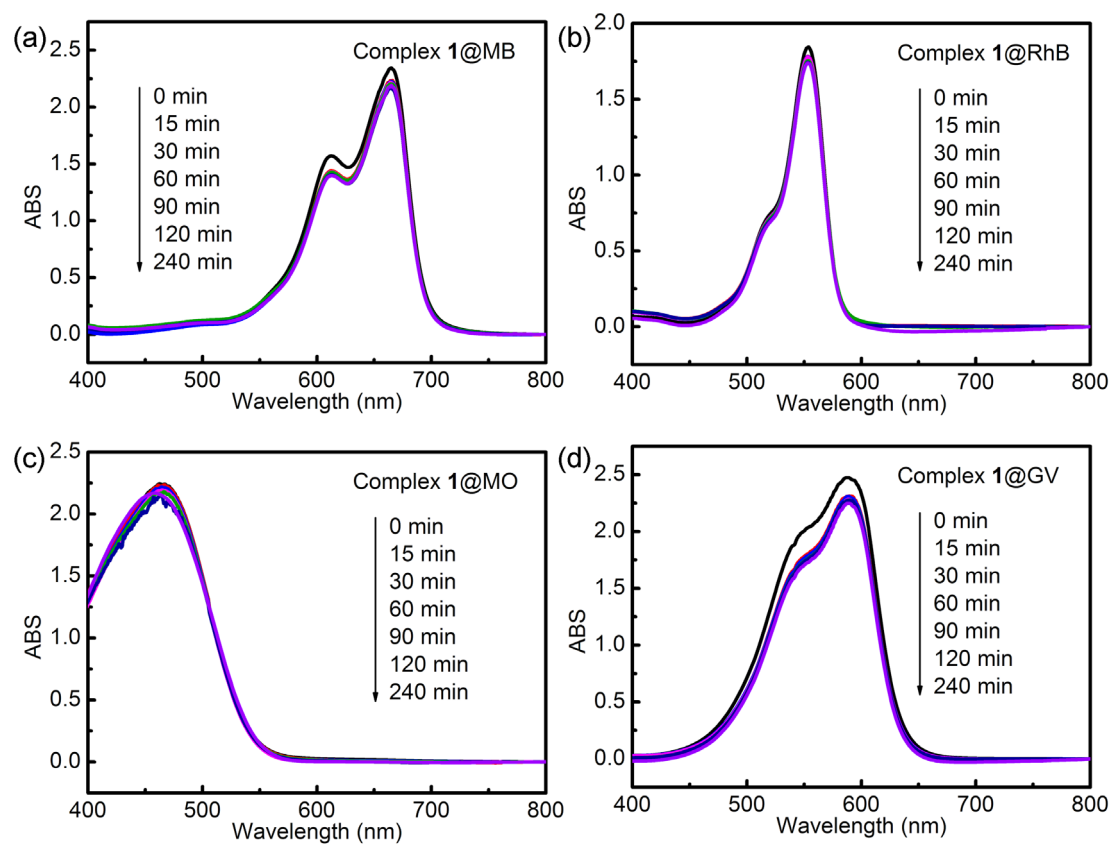

**Fig. S4** UV-vis spectra of MB (a), RhB (b), MO (c), GV (d) solutions after different adsorption times with complex 1.

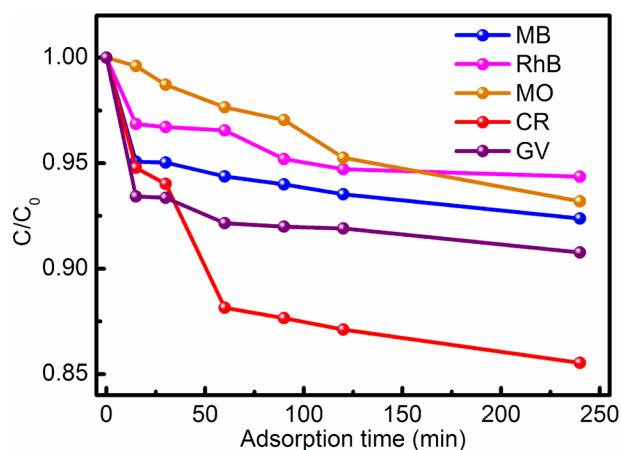

**Fig. S5** The adsorption rates of MB, RhB, MO, CR and GV at different times with complex 1.

## Supporting Information

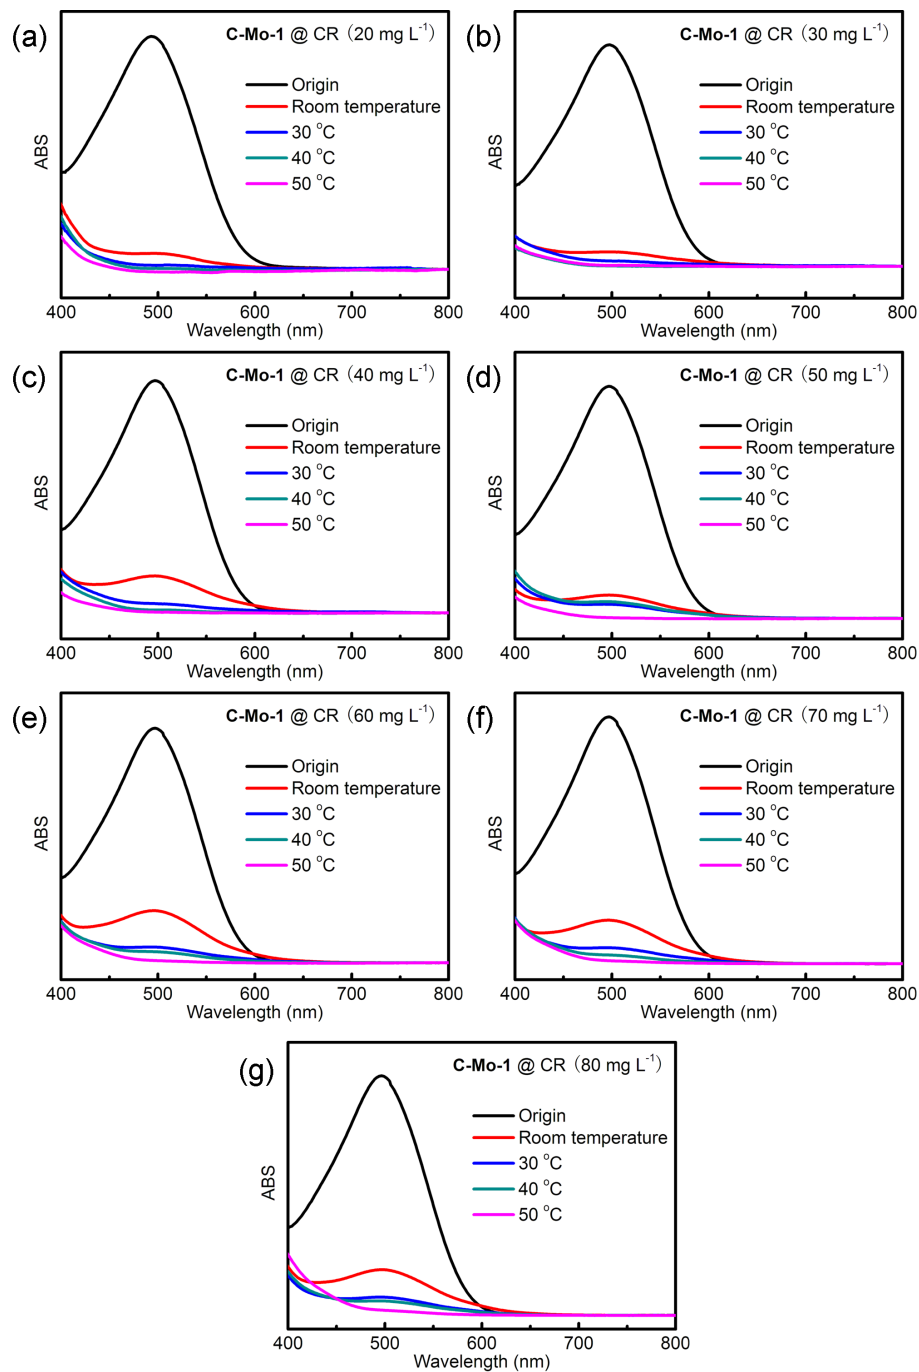

**Fig. S6** UV-vis spectra of different concentrations of CR solutions after 240 min with C-Mo-1 at different temperatures.

## Supporting Information

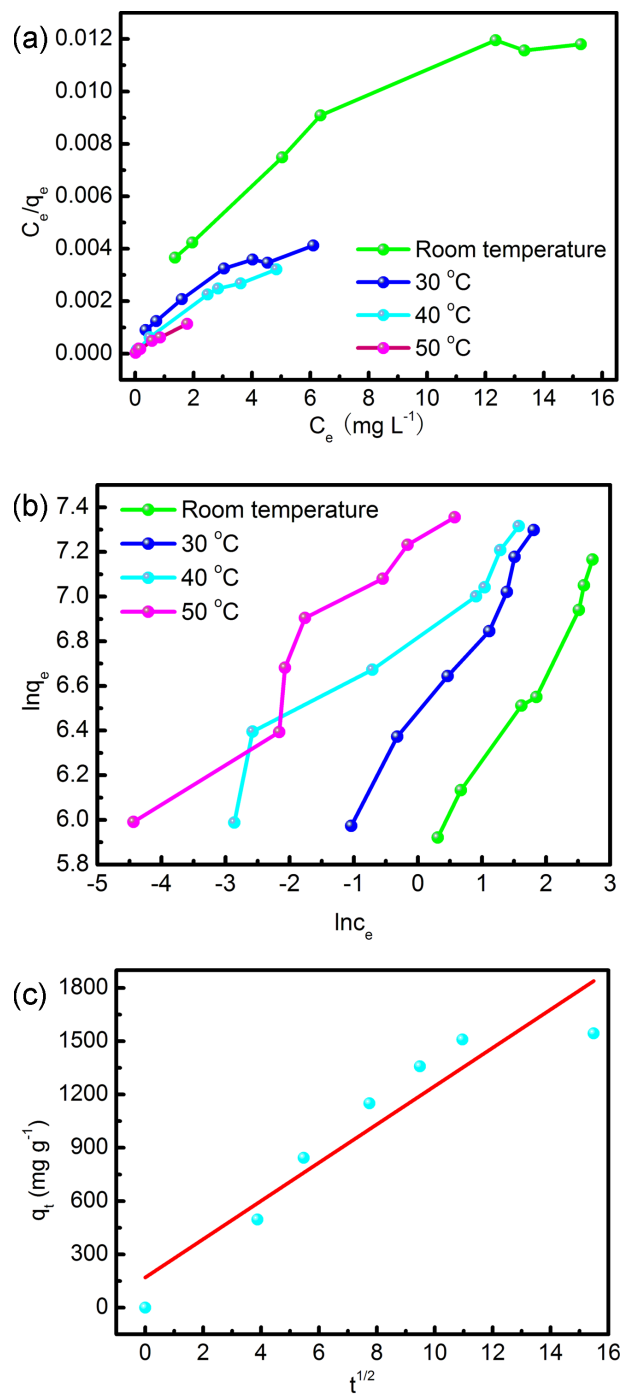

**Fig. S7** Adsorption kinetics of CR adsorbed by **C-Mo-1**: (a) Pseudo-first-order model; (b) Pseudo-second-order model; (c) Intra-particle diffusion model.

## Supporting Information

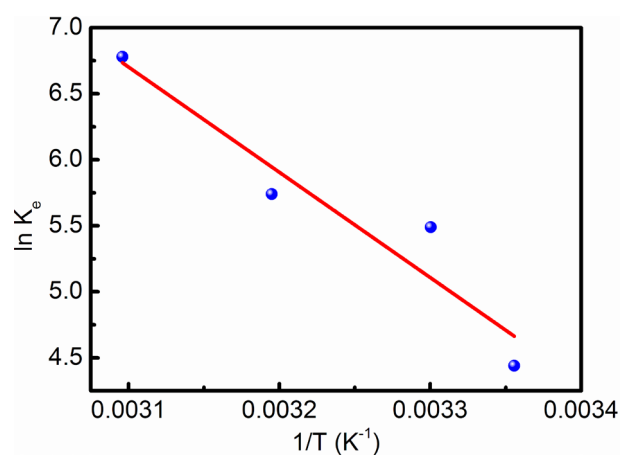

**Fig. S8** The plot of  $\ln K_e$ - $1/T$  for adsorption of CR on **C-Mo-1**.

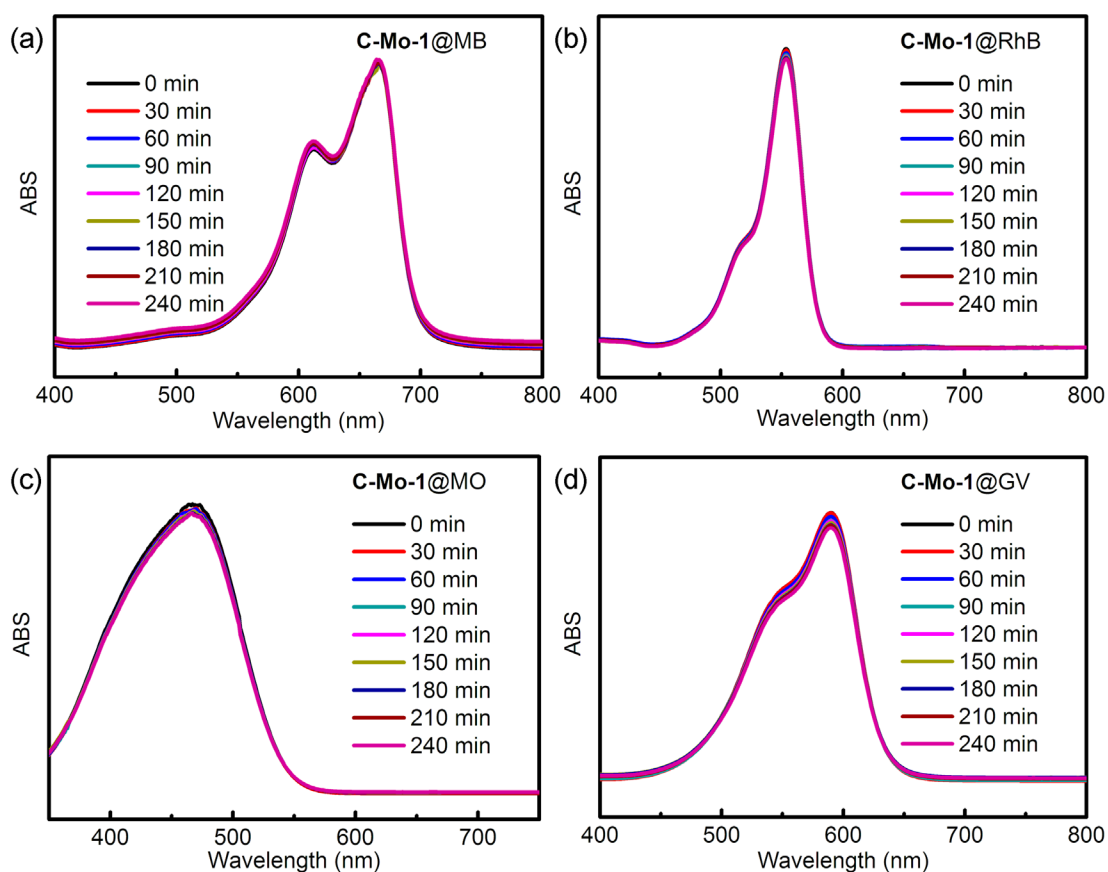

**Fig. S9** UV-vis spectra of MB (a), RhB (b), MO (c) and GV (d) solutions after different adsorption times with **C-Mo-1**.



## Supporting Information

---

### Reference:

- S1 S. J. Liu, C. Cao, C. C. Xie, T. F. Zheng, X. L. Tong, J. S. Liao, J. L. Chen, H. R. Wen, Z. Chang and X. H. Bu, *Dalton Trans.*, 2016, **45**, 9209–9215.
- S2 A. Drzewiecka-Antonik, A. E. Koziol, P. Rejmak, K. Lawniczak-Jablonska, L. Nittler, T. Lis, *Polyhedron*, 2017, **132**, 1–11.
- S3 P. Gunari, S. Krishnasamy, S. Q. Bai and T. S. A. Hor, *Dalton Trans.*, 2010, **39**, 9462–9464.
- S4 L. Li, J. Jin, Z. F. Shi, L. M. Zhao, J. C. Liu, Y. H. Xing and S. Y. Niu, *Inorg. Chim. Acta*, 2010, **363**, 748–754.
- S5 L. Li, S. Y. Niu, J. Jin, Q. Meng, Y. X. Chi, Y. H. Xing and G. N. Zhang, *J. Solid State Chem.*, 2011, **184**, 1279–1285.
- S6 X. F. Li, Y. Y. Wu, H. J. Lun, H. Y. Li, J. H. Yang and Y. M. Li, *Synthetic Met.*, 2017, **232**, 103–110.
- S7 O. Mtioui-Sghaier, R. Mendoza-Meroño, E. Fernández-Zapico, S. García-Granda, A. Fernández-González, L. Ktari and M. Dammak, *J. Mol. Struct.*, 2016, **1105**, 105–111.
- S8 A. G. Pesaroglo, E. E. Martsinko, L. K. Minacheva, I. I. Seifullina and V. S. Sergienko, *Rus. J. Inorg. Chem.*, 2010, **55**, 1366–1372.
- S9 I. I. Seifullina, E. E. Martsinko, E. A. Chebanenko, V. V. D'yakonenko, S. V. Shishkina and O. V. Pirozhok, *J. Struct. Chem.*, 2018, **59**, 154–159.
- S10 S. F. Weng, Y. H. Wang and C. S. Lee, *J. Solid State Chem.*, 2012, **188**, 77–83.
- S11 R. H. Zhang, W. S. Xia, H. X. Wang and Z. H. Zhou, *Inorg. Chem. Commun.*, 2009, **12**, 583–587.
- S12 B. J. Zhang, C. J. Wang, G. M. Qiu, S. Huang, X. L. Zhou, J. Weng and Y. Y. Wang, *Inorg. Chim. Acta*, 2013, **397**, 48–59.
